# Supplementary material for: Patterns of flavored e-cigarette use at the time of quitting smoking: comparison between American young adults (18-24 years old) and older adults (&gt;24 years old)
Source: Research Square preprint supplement (doi:10.21203/rs.3.rs-6388684/v1), 2025-04-28
Supplement: Supplementary file 1 [file a85ae02d42953c67f04b3bfc.docx]

**Supplementary Table 1.** Residence state of all participants (N =51641).

|  | Young adults (n = 9895) | | Older adults (n = 41746) | |
| --- | --- | --- | --- | --- |
| States | % | n | % | n |
| Alabama | 2.1% | 210 | 2.5% | 1036 |
| Alaska | 0.3% | 29 | 0.2% | 91 |
| Arizona | 2.5% | 243 | 2.3% | 975 |
| Arkansas | 1.3% | 132 | 1.1% | 464 |
| California | 6.0% | 591 | 6.5% | 2708 |
| Colorado | 2.1% | 212 | 1.6% | 660 |
| Connecticut | 0.8% | 84 | 1.0% | 435 |
| Delaware | 0.4% | 35 | 0.3% | 138 |
| District of Columbia | 0.1% | 9 | 0.1% | 22 |
| Florida | 4.8% | 475 | 5.8% | 2439 |
| Georgia | 4.3% | 425 | 3.7% | 1541 |
| Hawaii | 0.3% | 26 | 0.4% | 152 |
| Idaho | 1.3% | 133 | 0.5% | 209 |
| Illinois | 4.3% | 427 | 3.9% | 1644 |
| Indiana | 3.0% | 293 | 3.0% | 1270 |
| Iowa | 1.5% | 153 | 1.4% | 570 |
| Kansas | 0.9% | 94 | 0.9% | 392 |
| Kentucky | 2.9% | 287 | 2.5% | 1062 |
| Louisiana | 1.1% | 113 | 1.3% | 527 |
| Maine | 0.4% | 41 | 0.4% | 163 |
| Maryland | 1.5% | 148 | 2.0% | 835 |
| Massachusetts | 1.4% | 141 | 1.8% | 736 |
| Michigan | 3.4% | 333 | 3.0% | 1256 |
| Minnesota | 1.5% | 147 | 1.2% | 493 |
| Mississippi | 1.2% | 115 | 1.0% | 411 |
| Missouri | 2.2% | 219 | 2.2% | 918 |
| Montana | 0.3% | 34 | 0.3% | 106 |
| Nebraska | 0.7% | 68 | 0.7% | 275 |
| Nevada | 1.2% | 115 | 1.0% | 433 |
| New Hampshire | 0.7% | 65 | 0.6% | 235 |
| New Jersey | 1.4% | 142 | 2.2% | 924 |
| New Mexico | 0.5% | 53 | 0.5% | 198 |
| New York | 4.0% | 400 | 4.6% | 1917 |
| North Carolina | 3.0% | 299 | 3.2% | 1316 |
| North Dakota | 0.3% | 25 | 0.2% | 92 |
| Ohio | 5.8% | 569 | 5.3% | 2222 |
| Oklahoma | 1.7% | 171 | 1.8% | 740 |
| Oregon | 1.1% | 112 | 1.1% | 469 |
| Pennsylvania | 3.6% | 361 | 4.6% | 1911 |
| Rhode Island | 0.3% | 27 | 0.3% | 135 |
| South Carolina | 1.5% | 147 | 1.6% | 676 |
| South Dakota | 0.3% | 25 | 0.3% | 109 |
| Tennessee | 4.2% | 418 | 4.4% | 1821 |
| Texas | 6.5% | 643 | 6.8% | 2829 |
| Utah | 1.5% | 148 | 0.9% | 395 |
| Vermont | 0.2% | 17 | 0.2% | 96 |
| Virginia | 2.6% | 259 | 3.0% | 1273 |
| Washington | 3.1% | 307 | 1.9% | 788 |
| West Virginia | 1.1% | 104 | 1.1% | 474 |
| Wisconsin | 2.0% | 195 | 1.7% | 695 |
| Wyoming | 0.2% | 24 | 0.3% | 134 |
| Missing (no response) | 0.5% | 52 | 0.8% | 336 |
